# Supplementary material for: E7 Peptide Enables BMSC Adhesion and Promotes Chondrogenic Differentiation of BMSCs Via the LncRNA H19/miR675 Axis
Source: MDPI journal article supplement (doi:10.3390/bioengineering10070781), 2023-06-30
Supplement: s1 [file s1]

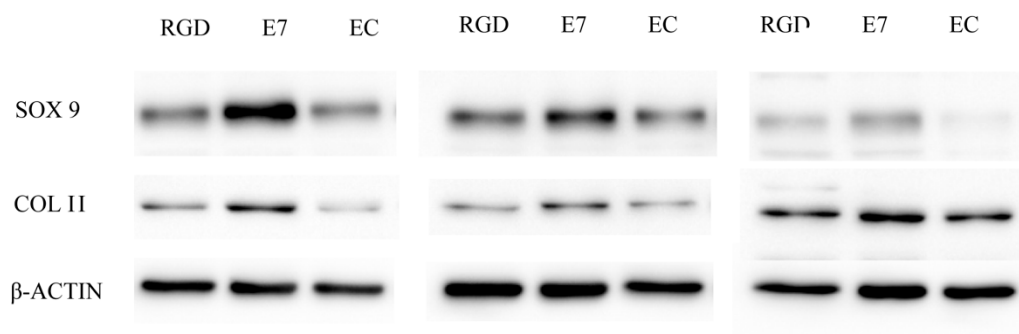

Original image of the subgraph 3B

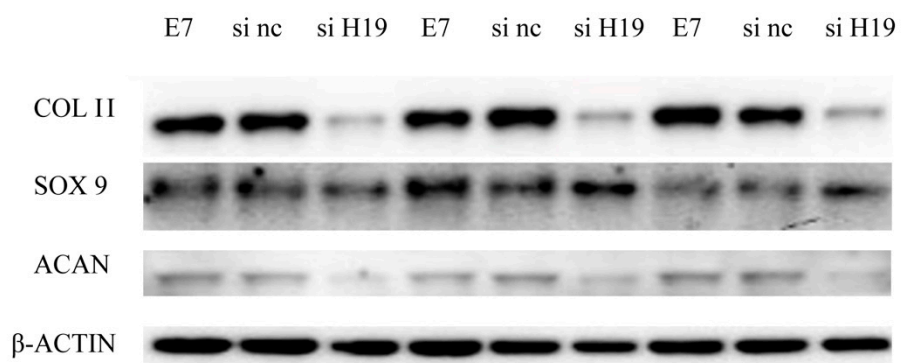

Original image of the subgraph 5C

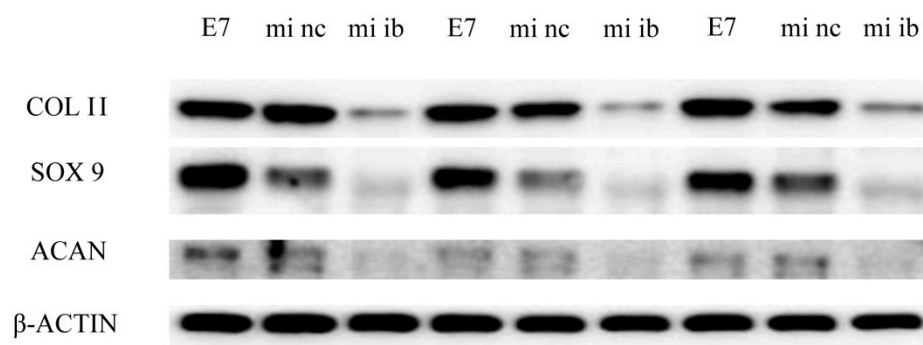

Original image of the subgraph 6B
